# Supplementary material for: A large copper-niobate cluster with the pagoda-shaped subunit {Nb20O59}
Source: Royal Society of Chemistry journal article supplement (doi:10.1039/d1cc00758k), 2021-01-01
Supplement: d1cc00758k1.pdf [file d1cc00758k1.pdf]

# A large copper-niobate cluster with pagoda-shaped subunit $\{\text{Nb}_{20}\text{O}_{59}\}$

Zhijie Liang,<sup>a,b</sup> Yuanyuan Qiao,<sup>a</sup> Xue Li,<sup>a</sup> Pengtao Ma,<sup>a</sup> Jingyang Niu,<sup>\*,a</sup> and Jingping Wang<sup>\*,a</sup>

<sup>a</sup>Henan Key Laboratory of Polyoxometalate Chemistry, College of Chemistry and Chemical Engineering, Henan University, Kaifeng 475004, Henan, P. R. China. E-mail: jyniu@henu.edu.cn, jpwang@henu.edu.cn; Fax: +86-371-23886876.

<sup>b</sup>College of Textiles and Clothing, Nantong University, Nantong 226019, Jiangsu, P. R. China.

## Materials and measurement

All the reagents were readily available from commercial sources and used without further purification. The FT-IR spectra in KBr pellets were recorded in the range 400–4000  $\text{cm}^{-1}$  with a Perkin-Elmer Spectrum Two spectrophotometer at room temperature. Elemental analyses for C, H, N were determined with a CHNS/O Vario EL cube elemental analyzer. The thermal behavior of compound was examined by Bruker Tensor-II thermal analyses (TG, Netzsch) for confirming the number of water molecules. The samples were heated to 700 °C with a heating rate of 10 °C /min, under a flowing  $\text{N}_2$  atmosphere. The UV-vis spectra were recorded in the range 200–800  $\text{cm}^{-1}$  with a UH 4150 spectrograph. ESI-MS were performed on an AB SCIEX Triple TOF 4600 spectrometer. The solution was infused at a flow rate of 5  $\mu\text{L}/\text{min}$  and the data were collected in negative-mode. Cu, Nb, K, Na examined by a PerkinElmer Optima 2100 DV inductively coupled plasma optical-emission spectrometer. ESR spectra were recorded with a Bruker EMXPLUS X-band spectrometer at room temperature. The magnetic field was calibrated with a Quantum Design SQUID MPMS3 magnetometer. EDS spectrum was obtained on a JSM-7610F scanning electron microscope equipped with OXFORD x-act EDS.

## Synthesis

A mixture of  $\text{K}_7\text{HNb}_6\text{O}_{19} \cdot 13\text{H}_2\text{O}$  (0.60 g, 0.438 mmol),<sup>S1</sup>  $\text{NaHCO}_3$  (0.18 g, 2.1 mmol),  $\text{Cu}(\text{CH}_3\text{COO})_2 \cdot \text{H}_2\text{O}$  (0.105 g, 0.526 mmol), KCl (0.097 g, 0.13 mmol) was mixed in 8 mL

deionized water. After stirred 40 min, 0.1 mL en was added. Stirring for about 20 min, the resulting mixture was sealed in a Teflon-lined autoclave (23 mL) and heated at 160 °C for 5 days. After cooling to room temperature, brownish red solution was obtained and left to evaporate slowly. Red block crystals appeared after 1 week. Yield: 10 % (based on  $K_7H[Nb_6O_{19}] \cdot 13H_2O$ ). Anal. Calcd (%) for  $C_{16}H_{263}N_{16}Cu_8K_{20}Na_{19}Nb_{144}O_{487}$ : C, 0.82; H, 1.12; N, 0.95; Cu, 2.16; Nb, 56.74; K, 3.32; Na, 1.85; found: C, 1.15; H, 1.22; N, 1.03; Cu, 2.23; Nb, 56.81; K, 3.50; Na, 1.94. IR (KBr): 3313, 1631, 1591, 1486, 1459, 1330, 1278, 1103, 1043, 913, 833, 763, 705, 607, 504, 477  $cm^{-1}$ .

### X-ray Crystallography

Good quality crystal was selected and placed on a Rigaku XtaLAB Pro diffractometer with Cu  $K\alpha$  radiation ( $\lambda = 1.54184 \text{ \AA}$ ) at 200 K. Data collection and reduction were performed using the program CrysAlisPro.<sup>S2</sup> The intensities were corrected for absorption using empirical method implemented in SCALE3 ABSPACK scaling algorithm. The structures were solved with direct methods,<sup>S3</sup> and refined by full-matrix least squares on  $F^2$  using OLEX2.<sup>S4</sup> Almost all the atoms except few lattice water molecules were refined anisotropically. The hydrogen atoms of the en groups were placed in calculated positions and then refined using a riding model ( $U_{iso} = 1.2 U_{eq}$ ). In addition, only 68 water molecules were achieved with the X-ray structure analysis and the remaining crystallization water molecules were estimated by thermogravimetry and CHN elemental analysis, namely  $K_{20}Na_{19}[H_{18.5}\{Cu(en)_2\}_2(H_4Cu_2Nb_{72}O_{205})]_2 \cdot 77H_2O$ . The crystal data and structure refinement results of the compound is summarized in Table S1.

Table S1. Crystal data and structural refinement for compound **1**.

|                   | Compound <b>1</b>                                     |
|-------------------|-------------------------------------------------------|
| Empirical Formula | $C_{16}H_{245}N_{16}Cu_8K_{20}Na_{19}Nb_{144}O_{478}$ |
| Formula Weight    | 23416.60                                              |
| Temperature/K     | 200                                                   |
| Crystal System    | Monoclinic                                            |
| Space Group       | $P2_1/n$                                              |
| $a/\text{\AA}$    | 39.8703(2)                                            |

|                                               |                                                                 |
|-----------------------------------------------|-----------------------------------------------------------------|
| $b/\text{\AA}$                                | 28.15080(10)                                                    |
| $c/\text{\AA}$                                | 63.1542(3)                                                      |
| $\beta/^\circ$                                | 92.7110(10)                                                     |
| Volume/ $\text{\AA}^3$                        | 70803.7(6)                                                      |
| $Z$                                           | 4                                                               |
| $\rho_{\text{calc}} \text{ g/cm}^3$           | 2.180                                                           |
| $\mu/\text{mm}^{-1}$                          | 20.418                                                          |
| $F(000)$                                      | 43284.0                                                         |
| Crystal Size/ $\text{mm}^3$                   | $0.16 \times 0.11 \times 0.08$                                  |
| Radiation                                     | Cu $K\alpha$ ( $\lambda = 1.54178 \text{ \AA}$ )                |
| $2\theta$ Range for Data Collection/ $^\circ$ | 4.438 to 147.344                                                |
| Index Ranges                                  | $-49 \leq h \leq 39, -19 \leq k \leq 34, -70 \leq l \leq 78$    |
| Reflections Collected                         | 286571                                                          |
| Independent Reflections                       | 135419 [ $R_{\text{int}} = 0.0578, R_{\text{sigma}} = 0.0855$ ] |
| Data/Restraints/Parameters                    | 135419/67/6227                                                  |
| Goodness-of-fit on $F^2$                      | 1.023                                                           |
| Final $R$ Indexes [ $I \geq 2\sigma(I)$ ]     | $R_1 = 0.0769, wR_2 = 0.1942$                                   |
| Final $R$ Indexes [all data]                  | $R_1 = 0.0958, wR_2 = 0.2077$                                   |
| Largest Diff. Peak/hole/ $e \text{ \AA}^{-3}$ | 3.95/-2.24                                                      |

## Figures and tables

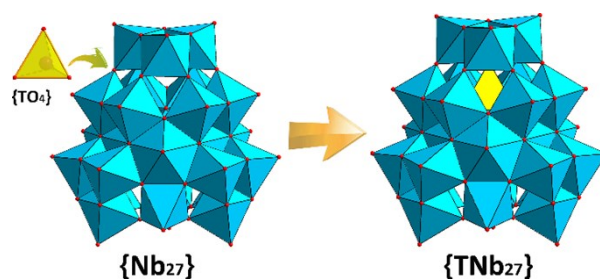

Fig. S1 Polyhedral representation of isopolyyniobate  $\{\text{Nb}_{27}\}$  and heteropolyyniobate  $\{\text{TNb}_{27}\}$ .

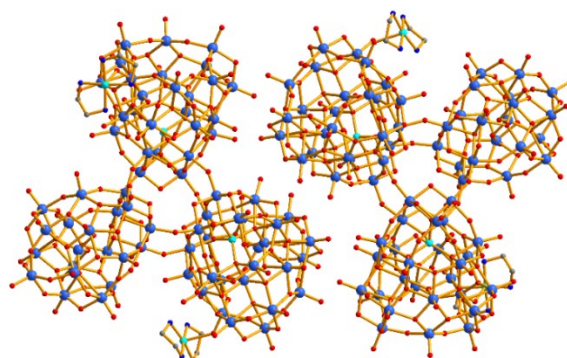

Fig. S2 Two polyoxoanions in compound **1** (Na, K atoms and  $\text{H}_2\text{O}$  molecules are omitted for clarity).

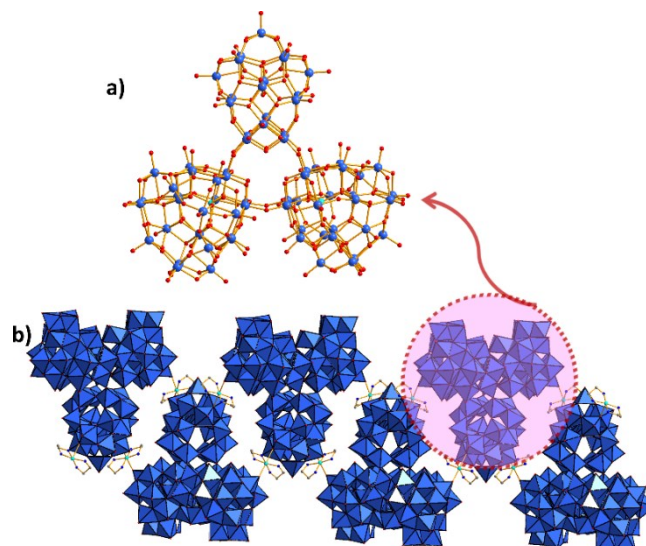

Fig. S3 a) Structural representation of polyoxoanion; b) one 1D chain structure of compound **1**.

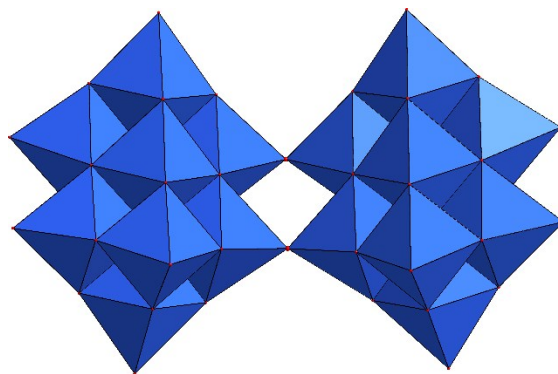

Fig. S4 Polyhedral representation of classical  $[\text{Nb}_{20}\text{O}_{54}]^{8-}$ .

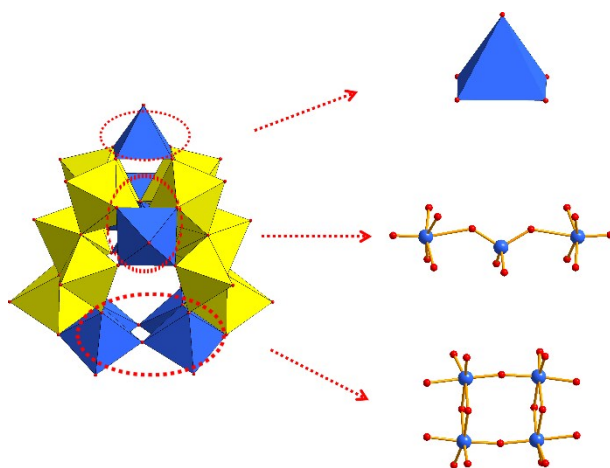

Fig. S5 Structural representations of  $\{\text{Nb}_{20}\text{O}_{59}\}$  subunit and three linker between two  $\{(\text{NbO}_7)\text{Nb}_5\}$  fragments.

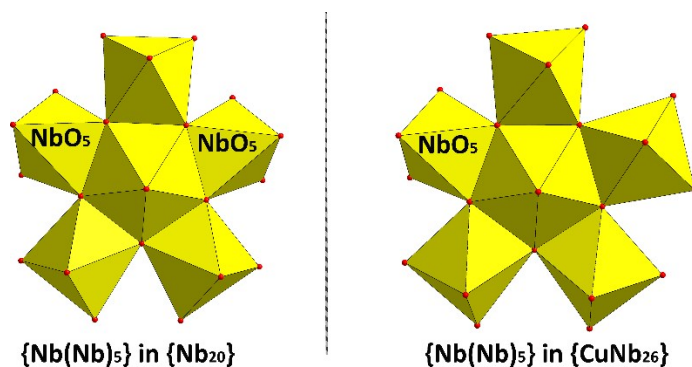

Fig. S6 {Nb(Nb)<sub>5</sub>} fragments in two subunits.

Table S2. The BVS of Nb atoms.

| Atom | Value | Atom | Value | Atom | Value | Atom | Value |
|------|-------|------|-------|------|-------|------|-------|
| Nb1  | 4.91  | Nb37 | 4.99  | Nb73 | 5.05  | Nb2E | 4.74  |
| Nb2  | 4.38  | Nb38 | 4.77  | Nb74 | 4.94  | Nb3A | 4.97  |
| Nb3  | 4.82  | Nb39 | 4.85  | Nb75 | 4.56  | Nb3B | 4.94  |
| Nb4  | 4.84  | Nb40 | 5.02  | Nb76 | 4.89  | Nb3C | 5.13  |
| Nb5  | 4.96  | Nb41 | 4.99  | Nb77 | 5.04  | Nb3D | 4.97  |
| Nb6  | 4.97  | Nb42 | 5.04  | Nb78 | 5.08  | Nb3E | 4.92  |
| Nb7  | 5.05  | Nb43 | 4.97  | Nb79 | 4.93  | Nb4A | 4.96  |
| Nb8  | 4.70  | Nb44 | 4.94  | Nb80 | 4.79  | Nb4B | 5.07  |
| Nb9  | 5.02  | Nb45 | 5.00  | Nb81 | 5.02  | Nb4C | 4.93  |
| Nb10 | 4.94  | Nb46 | 4.99  | Nb82 | 5.02  | Nb4D | 5.00  |
| Nb11 | 4.97  | Nb47 | 4.91  | Nb83 | 5.12  | Nb4E | 5.04  |
| Nb12 | 5.07  | Nb48 | 4.96  | Nb84 | 5.03  | Nb5A | 4.44  |
| Nb13 | 4.99  | Nb49 | 4.99  | Nb85 | 5.01  | Nb5B | 5.07  |
| Nb14 | 5.05  | Nb50 | 4.83  | Nb86 | 4.96  | Nb5C | 4.98  |
| Nb15 | 4.91  | Nb51 | 4.86  | Nb87 | 5.06  | Nb5D | 5.04  |
| Nb16 | 4.92  | Nb52 | 4.91  | Nb88 | 5.03  | Nb5E | 4.81  |
| Nb17 | 4.65  | Nb53 | 4.96  | Nb89 | 4.83  | Nb6A | 4.98  |
| Nb18 | 4.88  | Nb54 | 4.84  | Nb90 | 5.06  | Nb6B | 4.94  |
| Nb19 | 4.99  | Nb55 | 4.96  | Nb91 | 4.89  | Nb6C | 4.46  |
| Nb20 | 4.49  | Nb56 | 5.14  | Nb92 | 4.98  | Nb6D | 4.95  |
| Nb21 | 4.87  | Nb57 | 4.91  | Nb93 | 4.96  | Nb6E | 4.90  |
| Nb22 | 5.07  | Nb58 | 4.94  | Nb94 | 4.94  | Nb7A | 4.59  |
| Nb23 | 4.63  | Nb59 | 4.97  | Nb95 | 4.89  | Nb7B | 4.98  |
| Nb24 | 4.93  | Nb60 | 4.94  | Nb96 | 4.96  | Nb7C | 4.93  |
| Nb25 | 5.09  | Nb61 | 5.04  | Nb97 | 4.97  | Nb7D | 4.98  |
| Nb26 | 4.95  | Nb62 | 4.93  | Nb98 | 5.10  | Nb7E | 5.06  |
| Nb27 | 4.65  | Nb63 | 4.96  | Nb99 | 5.02  | Nb8A | 4.67  |

|      |      |      |      |      |      |      |      |
|------|------|------|------|------|------|------|------|
| Nb28 | 4.46 | Nb64 | 4.97 | Nb1A | 5.04 | Nb8B | 4.51 |
| Nb29 | 4.92 | Nb65 | 4.98 | Nb1B | 4.57 | Nb8C | 5.02 |
| Nb30 | 5.06 | Nb66 | 5.04 | Nb1C | 4.99 | Nb8D | 4.99 |
| Nb31 | 4.95 | Nb67 | 4.99 | Nb1D | 4.90 | Nb8E | 5.03 |
| Nb32 | 5.03 | Nb68 | 5.02 | Nb1E | 5.07 | Nb9A | 5.20 |
| Nb33 | 5.11 | Nb69 | 4.98 | Nb2A | 4.50 | Nb9B | 4.99 |
| Nb34 | 4.57 | Nb70 | 4.72 | Nb2B | 4.86 | Nb9C | 4.84 |
| Nb35 | 4.98 | Nb71 | 4.94 | Nb2C | 4.93 | Nb9D | 4.94 |
| Nb36 | 5.07 | Nb72 | 4.99 | Nb2D | 5.00 | Nb9E | 5.02 |

Table S3. The BVS of oxygen atoms in polyoxoanion.

| Atom | Value | Atom | Value | Atom | Value | Atom | Value |
|------|-------|------|-------|------|-------|------|-------|
| O1   | 1.53  | O104 | 1.87  | O207 | 1.49  | O310 | 1.85  |
| O2   | 1.52  | O105 | 1.88  | O208 | 1.69  | O311 | 1.95  |
| O3   | 1.80  | O106 | 1.97  | O209 | 1.56  | O312 | 1.71  |
| O4   | 1.64  | O107 | 1.44  | O210 | 1.60  | O313 | 1.76  |
| O5   | 1.48  | O108 | 1.72  | O211 | 1.52  | O314 | 1.60  |
| O6   | 1.45  | O109 | 2.00  | O212 | 1.60  | O315 | 1.12  |
| O7   | 1.50  | O110 | 1.56  | O213 | 1.74  | O316 | 2.01  |
| O8   | 1.69  | O111 | 1.83  | O214 | 1.60  | O317 | 1.58  |
| O9   | 1.58  | O112 | 1.89  | O215 | 1.91  | O318 | 1.74  |
| O10  | 1.52  | O113 | 1.94  | O216 | 1.64  | O319 | 1.95  |
| O11  | 1.50  | O114 | 1.70  | O217 | 1.59  | O320 | 1.97  |
| O12  | 1.54  | O115 | 1.84  | O218 | 1.79  | O321 | 1.94  |
| O13  | 1.50  | O116 | 1.96  | O219 | 1.76  | O322 | 1.97  |
| O14  | 1.65  | O117 | 1.48  | O220 | 1.50  | O323 | 1.96  |
| O15  | 1.69  | O118 | 1.38  | O221 | 1.77  | O324 | 1.86  |
| O16  | 1.84  | O119 | 1.79  | O222 | 1.61  | O325 | 1.74  |
| O17  | 1.80  | O120 | 1.95  | O223 | 1.48  | O326 | 1.44  |
| O18  | 1.96  | O121 | 1.38  | O224 | 1.84  | O327 | 1.78  |
| O19  | 1.83  | O122 | 1.48  | O225 | 1.59  | O328 | 1.90  |
| O20  | 1.92  | O123 | 1.48  | O226 | 1.63  | O329 | 1.28  |
| O21  | 1.97  | O124 | 1.46  | O227 | 1.45  | O330 | 1.67  |
| O22  | 1.69  | O125 | 1.79  | O228 | 1.53  | O331 | 1.94  |
| O23  | 1.71  | O126 | 1.90  | O229 | 1.86  | O332 | 1.92  |
| O24  | 1.72  | O127 | 1.79  | O230 | 1.60  | O333 | 1.89  |
| O25  | 1.54  | O128 | 1.91  | O231 | 1.81  | O334 | 1.73  |
| O26  | 1.46  | O129 | 1.75  | O232 | 1.62  | O335 | 1.80  |
| O27  | 1.57  | O130 | 1.91  | O233 | 2.44  | O336 | 1.69  |

|     |      |      |      |      |      |      |      |
|-----|------|------|------|------|------|------|------|
| O28 | 1.60 | O131 | 1.96 | O234 | 1.55 | O337 | 1.90 |
| O29 | 1.69 | O132 | 1.86 | O235 | 1.89 | O338 | 1.91 |
| O30 | 1.86 | O133 | 1.75 | O236 | 1.82 | O339 | 1.43 |
| O31 | 1.92 | O134 | 1.70 | O237 | 1.86 | O340 | 1.50 |
| O32 | 1.52 | O135 | 1.36 | O238 | 1.72 | O341 | 1.52 |
| O33 | 1.79 | O136 | 1.55 | O239 | 1.68 | O342 | 1.76 |
| O34 | 1.40 | O137 | 2.47 | O240 | 1.66 | O343 | 1.92 |
| O35 | 1.48 | O138 | 1.79 | O241 | 1.82 | O344 | 1.98 |
| O36 | 1.59 | O139 | 1.87 | O242 | 1.79 | O345 | 2.00 |
| O37 | 1.59 | O140 | 1.69 | O243 | 1.93 | O346 | 1.85 |
| O38 | 1.82 | O141 | 1.78 | O244 | 1.83 | O347 | 1.48 |
| O39 | 1.87 | O142 | 1.85 | O245 | 1.90 | O348 | 1.98 |
| O40 | 1.86 | O143 | 1.87 | O246 | 1.97 | O349 | 1.70 |
| O41 | 1.83 | O144 | 2.47 | O247 | 1.91 | O350 | 1.80 |
| O42 | 1.86 | O145 | 1.71 | O248 | 1.96 | O351 | 1.95 |
| O43 | 1.79 | O146 | 1.98 | O249 | 1.83 | O352 | 1.88 |
| O44 | 1.88 | O147 | 1.83 | O250 | 1.50 | O353 | 1.28 |
| O45 | 1.47 | O148 | 1.77 | O251 | 1.49 | O354 | 1.98 |
| O46 | 1.86 | O149 | 1.96 | O252 | 1.47 | O355 | 1.99 |
| O47 | 1.72 | O150 | 1.70 | O253 | 1.81 | O356 | 1.64 |
| O48 | 1.56 | O151 | 1.10 | O254 | 1.53 | O357 | 1.88 |
| O49 | 1.84 | O152 | 1.84 | O255 | 1.69 | O358 | 1.69 |
| O50 | 1.44 | O153 | 1.70 | O256 | 1.98 | O359 | 2.38 |
| O51 | 1.40 | O154 | 1.55 | O257 | 1.50 | O360 | 1.88 |
| O52 | 1.75 | O155 | 2.44 | O258 | 1.59 | O361 | 1.93 |
| O53 | 1.95 | O156 | 1.97 | O259 | 1.89 | O362 | 1.68 |
| O54 | 1.58 | O157 | 1.89 | O260 | 1.90 | O363 | 2.01 |
| O55 | 1.44 | O158 | 1.72 | O261 | 1.74 | O364 | 2.37 |
| O56 | 1.83 | O159 | 1.97 | O262 | 1.61 | O365 | 1.95 |
| O57 | 1.65 | O160 | 1.84 | O263 | 1.76 | O366 | 2.37 |
| O58 | 1.79 | O161 | 1.91 | O264 | 1.84 | O367 | 1.99 |
| O59 | 1.96 | O162 | 1.79 | O265 | 1.27 | O368 | 1.61 |
| O60 | 1.87 | O163 | 2.48 | O266 | 1.89 | O369 | 1.62 |
| O61 | 1.50 | O164 | 1.65 | O267 | 1.45 | O370 | 2.01 |
| O62 | 1.93 | O165 | 1.97 | O268 | 1.89 | O371 | 1.86 |
| O63 | 1.91 | O166 | 1.96 | O269 | 1.97 | O372 | 1.72 |
| O64 | 1.86 | O167 | 1.68 | O270 | 1.93 | O373 | 1.90 |
| O65 | 1.65 | O168 | 1.68 | O271 | 1.41 | O374 | 2.45 |
| O66 | 1.72 | O169 | 1.26 | O272 | 1.81 | O375 | 2.46 |
| O67 | 1.91 | O170 | 1.96 | O273 | 1.55 | O376 | 1.70 |
| O68 | 1.44 | O171 | 1.30 | O274 | 1.51 | O377 | 1.86 |

|      |      |      |      |      |      |      |      |
|------|------|------|------|------|------|------|------|
| O69  | 1.66 | O172 | 1.86 | O275 | 1.64 | O378 | 1.74 |
| O70  | 1.79 | O173 | 1.99 | O276 | 1.43 | O379 | 1.61 |
| O71  | 1.50 | O174 | 1.28 | O277 | 1.71 | O380 | 1.89 |
| O72  | 1.22 | O175 | 1.76 | O278 | 1.45 | O381 | 1.95 |
| O73  | 1.90 | O176 | 1.83 | O279 | 1.85 | O382 | 1.95 |
| O74  | 1.48 | O177 | 2.01 | O280 | 1.75 | O383 | 1.99 |
| O75  | 1.55 | O178 | 1.88 | O281 | 1.87 | O384 | 2.35 |
| O76  | 1.89 | O179 | 1.96 | O282 | 1.92 | O385 | 1.95 |
| O77  | 1.82 | O180 | 1.42 | O283 | 1.70 | O386 | 1.68 |
| O78  | 1.56 | O181 | 1.56 | O284 | 1.91 | O387 | 1.81 |
| O79  | 1.89 | O182 | 1.93 | O285 | 2.43 | O388 | 2.43 |
| O80  | 1.49 | O183 | 1.96 | O286 | 1.52 | O389 | 1.09 |
| O81  | 1.58 | O184 | 1.89 | O287 | 1.46 | O390 | 2.00 |
| O82  | 1.83 | O185 | 1.30 | O288 | 1.81 | O391 | 1.99 |
| O83  | 1.70 | O186 | 1.89 | O289 | 1.56 | O392 | 1.99 |
| O84  | 1.83 | O187 | 1.65 | O290 | 1.65 | O393 | 1.48 |
| O85  | 1.51 | O188 | 2.43 | O291 | 1.99 | O394 | 1.91 |
| O86  | 1.66 | O189 | 1.96 | O292 | 1.72 | O395 | 1.99 |
| O87  | 1.72 | O190 | 1.52 | O293 | 1.98 | O396 | 1.94 |
| O88  | 1.97 | O191 | 1.49 | O294 | 1.97 | O397 | 1.88 |
| O89  | 1.70 | O192 | 1.49 | O295 | 1.49 | O398 | 1.98 |
| O90  | 1.54 | O193 | 1.59 | O296 | 1.88 | O399 | 1.99 |
| O91  | 1.43 | O194 | 1.69 | O297 | 1.52 | O400 | 2.48 |
| O92  | 2.00 | O195 | 1.55 | O298 | 1.66 | O401 | 2.46 |
| O93  | 1.59 | O196 | 1.73 | O299 | 1.92 | O402 | 1.80 |
| O94  | 1.90 | O197 | 1.82 | O300 | 2.02 | O403 | 1.92 |
| O95  | 1.95 | O198 | 1.55 | O301 | 2.01 | O404 | 1.91 |
| O96  | 1.76 | O199 | 1.83 | O302 | 1.07 | O405 | 1.85 |
| O97  | 1.87 | O200 | 1.86 | O303 | 1.73 | O406 | 1.74 |
| O98  | 1.64 | O201 | 1.57 | O304 | 1.93 | O407 | 2.01 |
| O99  | 1.92 | O202 | 1.51 | O305 | 1.69 | O408 | 1.96 |
| O100 | 1.67 | O203 | 1.92 | O306 | 1.69 | O409 | 1.94 |
| O101 | 1.69 | O204 | 1.57 | O307 | 1.42 | O410 | 1.70 |
| O102 | 1.99 | O205 | 1.89 | O308 | 1.78 |      |      |
| O103 | 1.89 | O206 | 1.93 | O309 | 1.75 |      |      |

---



## IR spectra

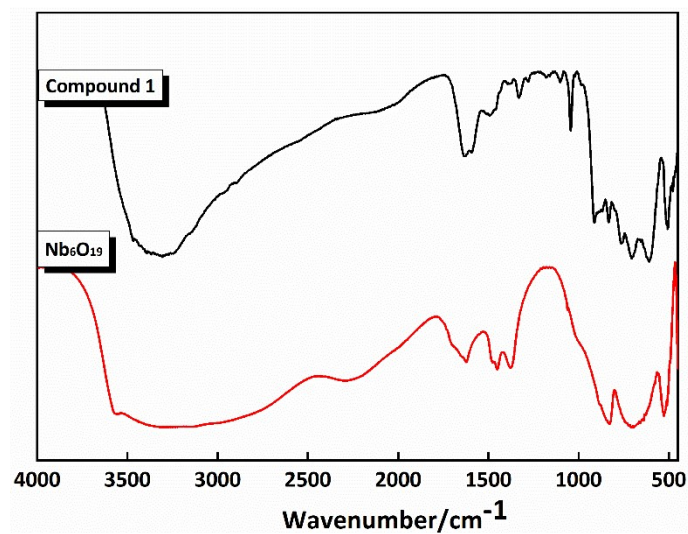

Fig. S7 IR spectra of compound **1** and {Nb<sub>6</sub>O<sub>19</sub>}.

## TG analysis

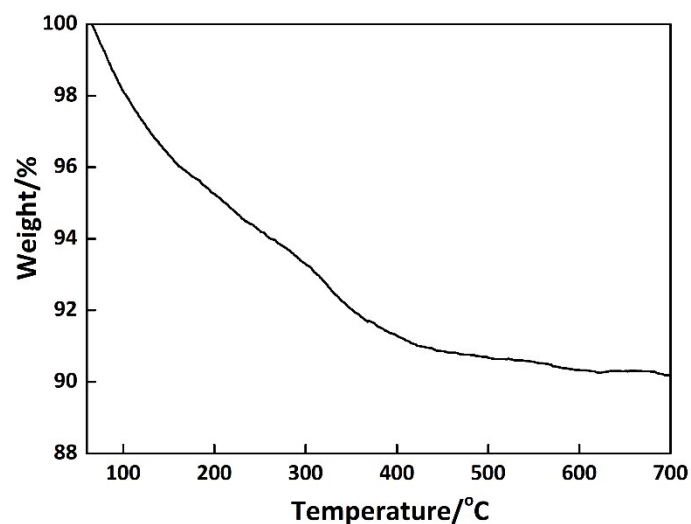

Fig. S8 TGA curve of compound **1**.

As shown in Fig. S8, the TG curve of compound **1** shows one step weight loss of 9.83 %, corresponding to the release of lattice water molecules, the dehydration of 45 protons and eight ethylenediamine molecules. Therefore, the number of lattice water molecule is 77, namely  $\text{K}_{20}\text{Na}_{19}[\text{H}_{18.5}\{\text{Cu}(\text{en})_2\}_2(\text{H}_4\text{Cu}_2\text{Nb}_{72}\text{O}_{205})]_2 \cdot 77\text{H}_2\text{O}$ . The calculated value is 9.87 %.

## UV spectrum

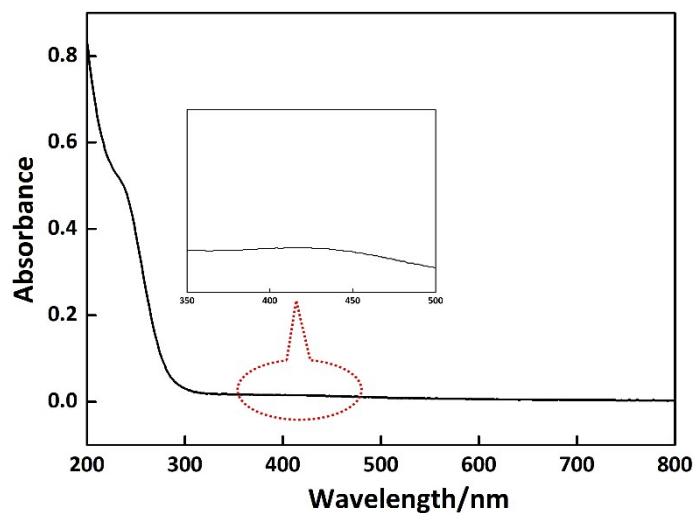

Fig. S9 UV spectrum of compound **1** (inset: a higher concentration of the compound).

## EDS-TEM

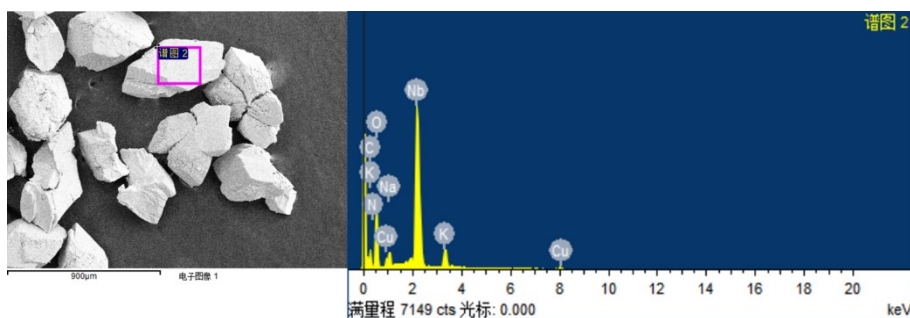

Fig. S10 The TEM of compound **1** and the EDS spectrum.

Table S4. The EDS results about the relative atomic number (based on the number of Cu) and the average value

| Element | 1      | 2      | 3      | 4      | Average value |
|---------|--------|--------|--------|--------|---------------|
| Cu      | 1.000  | 1.000  | 1.000  | 1.000  | 1.00          |
| Nb      | 13.070 | 14.680 | 14.540 | 15.000 | 14.32         |
| K       | 2.505  | 2.972  | 2.830  | 2.860  | 2.79          |
| Na      | 1.866  | 3.000  | 2.610  | 1.930  | 2.35          |

## ESI-MS analysis

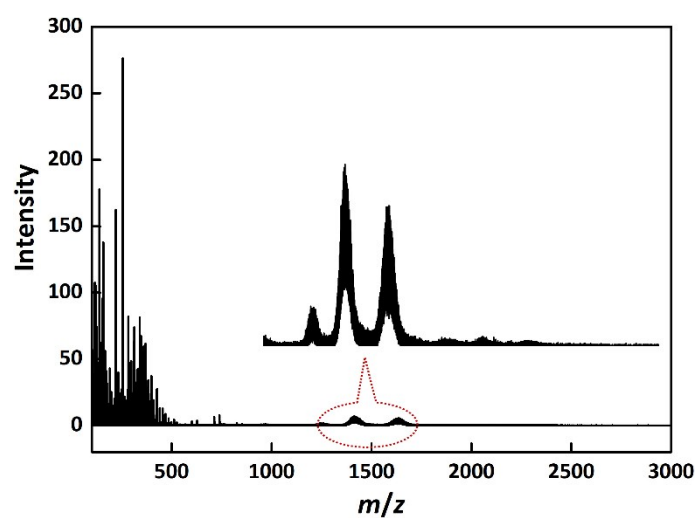

Fig. S11 ESI-MS spectra of compound 1 at  $m/z$  100–3000.

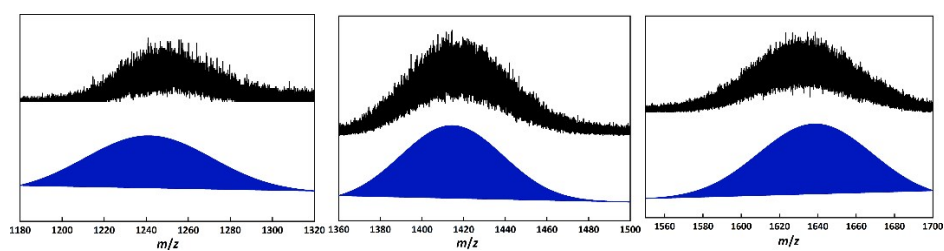

Fig. S12 Experimental (upper, black) and simulative (under, blue) peaks.

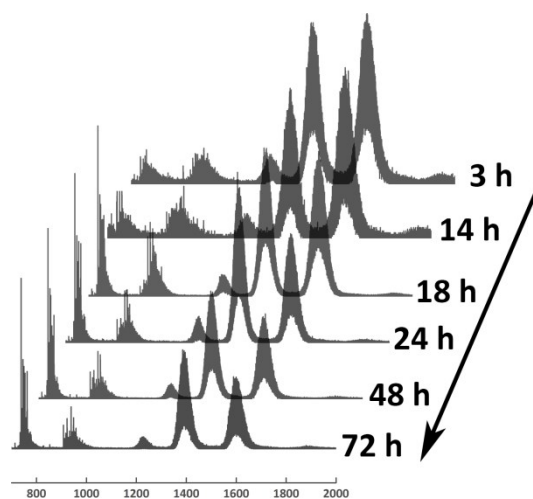

Fig. S13 Time-resolved stability of the solution of compound 1.

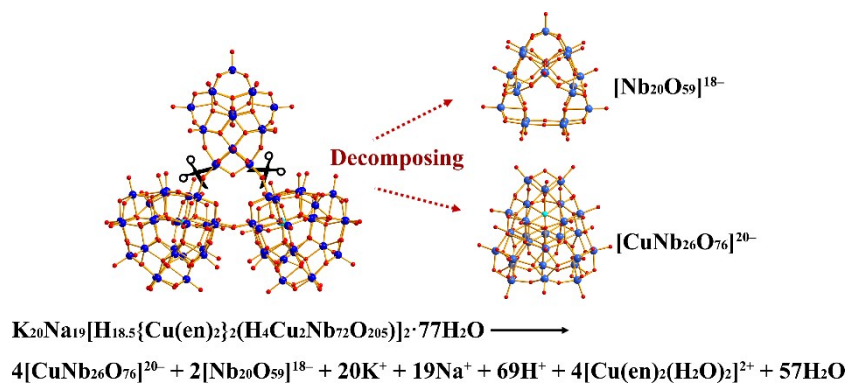

Fig. S14 The scheme and equation for showing the compositions of the fragmented parts.

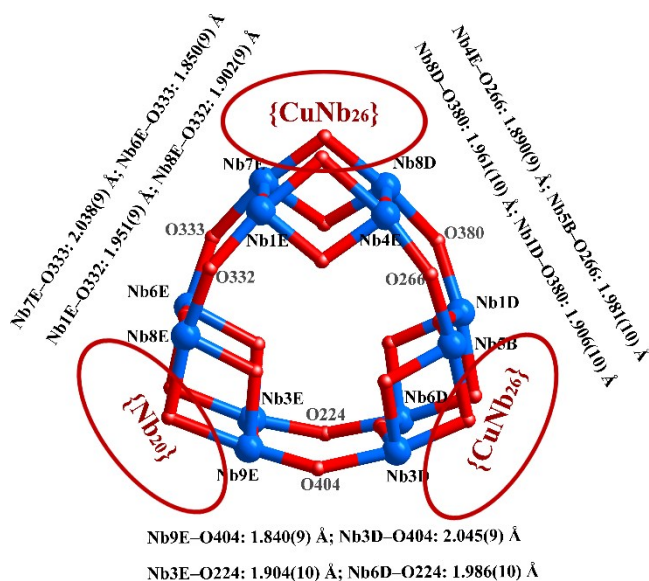

Fig. S15 The connection mode in {Nb<sub>12</sub>} cavity and the relevant Nb–O bond lengths.

### Magnetic property

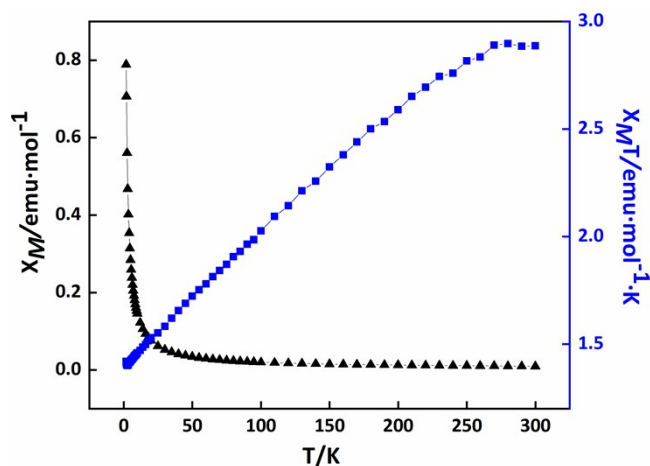

Fig. S16 Temperature dependence of  $\chi_M$  and  $\chi_M T$  of compound 1.

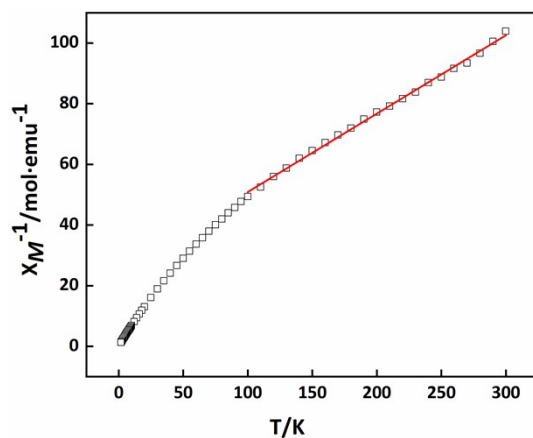

Fig. S17 Temperature dependence of  $1/\chi_M$  of compound **1**.

### References

- S1. M. Filowitz, R. K. C. Ho, W. G. Klemperer and W. Shum, *Inorg. Chem.*, 1979, **18**, 93.
- S2. CrysAlis<sup>Pro</sup> Version 1.171.36.31. (2012). Agilent Technologies Inc. Santa Clara, CA, USA
- S3. L. J. Bourhis, O. V. Dolomanov, R. J. Gildea, J. A. K. Howard and H. Puschmann, *Acta Cryst.*, 2015, **A71**, 59.
- S4. O. V. Dolomanov, L. J. Bourhis, R. J. Gildea, J. A. K. Howard and H. Puschmann, *J. Appl. Cryst.*, 2009, **42**, 339.
